# Supplementary material for: Pathology Foundation Models
Source: PubMed Central journal article supplement (PMC11799676; doi:10.31662/jmaj.2024-0206), 2024-12-20
Supplement: 2433-3298-8-1-0121-s001.pdf [file 2433-3298-8-1-0121-s001.pdf]

|                                              |                          |                            |                                     |                 |                                                                                                                                     |                                                             |                            |                                                        |                                                             |                                |                             |                                                                       |
|----------------------------------------------|--------------------------|----------------------------|-------------------------------------|-----------------|-------------------------------------------------------------------------------------------------------------------------------------|-------------------------------------------------------------|----------------------------|--------------------------------------------------------|-------------------------------------------------------------|--------------------------------|-----------------------------|-----------------------------------------------------------------------|
| Foundation Model Name                        | CTransPath               | (Lunit)*                   | Phikon                              | PLIP            | REMEDIS                                                                                                                             | Virchow                                                     | UNI                        | CONCH                                                  | PRISM                                                       | Prov-GigaPath                  | TANGLE                      | RudolphV                                                              |
| Publication Date                             | 2022                     | 2022                       | 2023                                | 2023            | 2023                                                                                                                                | 2023                                                        | 2024                       | 2024                                                   | 2024                                                        | 2024                           | 2024                        | 2024                                                                  |
| Journal Name                                 | Medical Image Analysis   | arxiv                      | arxiv                               | Nature Medicine | Nature biomedical engineering                                                                                                       | arxiv                                                       | Nature Medicine            | Nature Medicine                                        | arxiv                                                       | Nature                         | CVPR2024                    | arxiv                                                                 |
| Pretraining Dataset                          | TCGA PAIP                | TCGA TULIP                 | PanCancer40M TCGA-COAD              | OpenPath        | JFT-300M CAMELYON16 TCGA Colorectal tissue slides from the Institute of Pathology and the Biobank at the Medical University of Graz | Dataset from Memorial Sloan Kettering Cancer Center (MSKCC) | Mass-100K Mass-1K Mass-22K | Educational sources PubMed Central Open Access Dataset | Dataset from Memorial Sloan Kettering Cancer Center (MSKCC) | Dataset from Providence        | TCGA TG-GATEs               | Dataset from over 15 different laboratories across the EU and US TCGA |
| Number of GPUs/Type Used for Training        | 48/ NVIDIA V100 GPUs     | 64/ NVIDIA V100 GPUs       | 16-64/ NVIDIA V100 GPUs             | Not Specified   | 16–256/ Google Cloud TPU cores                                                                                                      | –/NVIDIA A100 GPUs                                          | 32/ NVIDIA A100 GPUs       | 8/ NVIDIA A100 GPUs                                    | 16/ NVIDIA V100 GPUs                                        | 16 nodes × 4/ NVIDIA A100 GPUs | 8/ NVIDIA A100 GPUs         | 16/ NVIDIA A100 GPUs                                                  |
| Embedding Level (patch/slide)                | patch                    | patch                      | patch                               | patch           | patch                                                                                                                               | patch                                                       | patch                      | patch                                                  | slide                                                       | slide                          | slide                       | patch                                                                 |
| Number of WSIs                               | 29,763(TCGA) 2,457(PAIP) | 20,994(TCGA) 15,672(TULIP) | 6,093(PanCan cer40M) 441(TCGA-COAD) | Not Specified   | 29,018(TCGA)                                                                                                                        | 1,488,550                                                   | 100,426                    | Not Specified                                          | 587,196                                                     | 171,189                        | 2,074(TCGA) 6,597(TG-GATEs) | 133,998                                                               |
| Number of Patch Images(M)                    | 15                       | 32.6                       | 43                                  | 0               | 50                                                                                                                                  | 2,000                                                       | 100                        | 1                                                      | Not Specified                                               | 1,300                          | 15                          | 1,200                                                                 |
| Number of Patients                           | Not specified            | Not specified              | 5,558                               | Not specified   | 10,705                                                                                                                              | 119,629                                                     | Not specified              | Not specified                                          | 195,344                                                     | >30,000                        | >1,864                      | 34,103                                                                |
| More than 10 types of organs in the dataset? | Yes                      | Yes                        | Yes                                 | Yes             | Yes                                                                                                                                 | Yes                                                         | Yes                        | Yes                                                    | Yes                                                         | Yes                            | No                          | Yes                                                                   |
| Staining Types (H&E/H&E+Others)              | Not specified            | H&E                        | H&E                                 | H&E+Others      | Not Specified                                                                                                                       | H&E                                                         | H&E                        | H&E+Others                                             | H&E                                                         | H&E+Others                     | Not Specified               | H&E+Others                                                            |
| FFPE/frozen                                  | FFPE, frozen             | Not Specified              | FFPE                                | Not Specified   | Not Specified                                                                                                                       | FFPE                                                        | FFPE                       | Not Specified                                          | Not Specified                                               | Not Specified                  | Not Specified               | FFPE, Frozen                                                          |
| VFM/MFM                                      | VFM                      | VFM                        | VFM                                 | MFM             | VFM                                                                                                                                 | VFM                                                         | VFM                        | MFM                                                    | MFM                                                         | MFM                            | MFM                         | VFM                                                                   |
| Model Publicly Available?                    | Yes                      | Yes                        | Yes                                 | Yes             | Yes                                                                                                                                 | Yes                                                         | Yes                        | Yes                                                    | Yes                                                         | Yes                            | No                          | Yes                                                                   |
| Reference Number                             | 33                       | 25                         | 26                                  | 28              | 23                                                                                                                                  | 27                                                          | 29                         | 30                                                     | 31                                                          | 22                             | 10                          | 32                                                                    |
